# Supplementary material for: μChIP—a rapid micro chromatin immunoprecipitation assay for small cell samples and biopsies
Source: PubMed Central journal article supplement — Nucleic Acids Res. 2008 Jan 17;36(3):e15. doi: 10.1093/nar/gkm1158 (PMC2241883; doi:10.1093/nar/gkm1158), 2008-01-17
Supplement: nar_gkm1158_1.pdf [file nar_gkm1158_1.pdf]

# $\mu$ ChIP – A rapid micro chromatin immunoprecipitation assay for small cell samples and biopsies

Dahl and Collas

## Supplementary Data

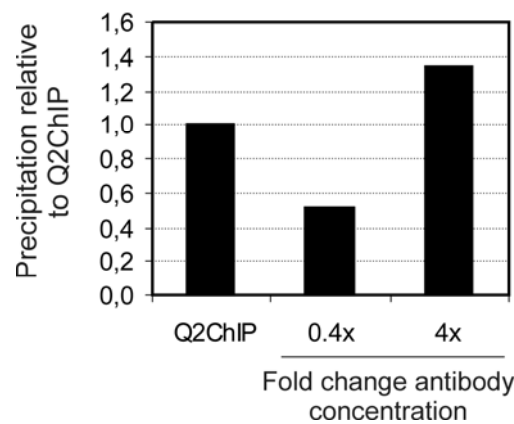

**Supplementary Figure 1.** Effect of antibody titration on ChIP efficiency. Antibody concentration (anti-H3K9ac) in the assay was altered 0.4- or 4-fold relative to that used in Q<sup>2</sup>ChIP. Binding to the *GAPDH* promoter was assessed.

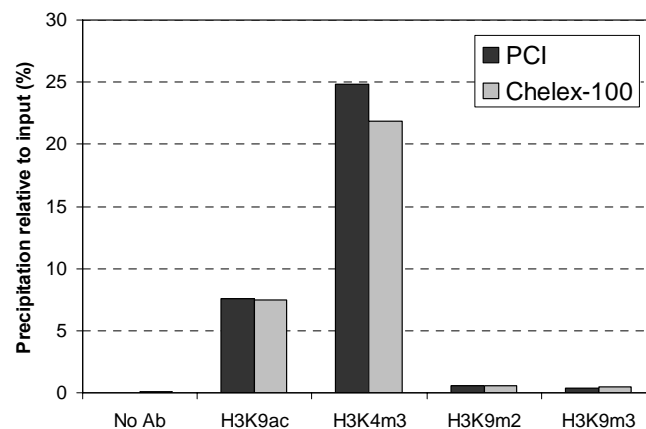

**Supplementary Figure 2.** Comparison of enrichment patterns of indicated H3 modifications on the *NANOG* promoter following ChIP and ChIP DNA purification with phenol-chloroform isoamylalcohol (PCI) or Chelex-100. Starting material for ChIP was 100,000 NCCIT cells. Data are expressed as percent precipitated DNA relative to input. Input DNAs were purified by PCI and with Chelex-100, respectively.
